# Supplementary material
Source: PubMed Central journal article supplement (PMC8460678)
Supplement: NIHMS1701206-supplement-1.pdf [file NIHMS1701206-supplement-1.pdf]

**Supplemental Table 2: Baseline characteristics of young CRVO patients who had hypercoagulable testing or progressed to being diagnosed with a hypercoagulable state at 1 year**

|                                        | Hypercoagulable testing |                 |                   |            | Hypercoagulable State at 1 year |                  |                   |            |
|----------------------------------------|-------------------------|-----------------|-------------------|------------|---------------------------------|------------------|-------------------|------------|
|                                        | No<br>(N=731)           | Yes<br>(N=450)  | Total<br>(N=1181) | p<br>value | No<br>(N=1045)                  | Yes<br>(N=136)   | Total<br>(N=1181) | p<br>value |
| <b>Gender (F)</b>                      | 307<br>(42.0%)          | 204<br>(45.3%)  | 511<br>(43.3%)    | 0.261      | 449<br>(43.0%)                  | 62<br>(45.6%)    | 511<br>(43.3%)    | 0.562      |
| <b>Age (Mean (SD))</b>                 | 40.7<br>(8.590)         | 39.1<br>(8.707) | 40.1<br>(8.662)   | 0.004      | 40.5<br>(8.395)                 | 37.2<br>(10.071) | 40.1<br>(8.662)   | <0.001     |
| <b>Smoking Hx</b>                      | 110<br>(15.0%)          | 46<br>(10.2%)   | 156<br>(13.2%)    | 0.017      | 143<br>(13.7%)                  | 13<br>(9.6%)     | 156<br>(13.2%)    | 0.181      |
| <b>Hypertension Hx</b>                 | 298<br>(40.8%)          | 141<br>(31.3%)  | 439<br>(37.2%)    | 0.001      | 395<br>(37.8%)                  | 44<br>(32.4%)    | 439<br>(37.2%)    | 0.216      |
| <b>Diabetes Mellitus Hx</b>            | 156<br>(21.3%)          | 60<br>(13.3%)   | 216<br>(18.3%)    | <0.001     | 197<br>(18.9%)                  | 19<br>(14.0%)    | 216<br>(18.3%)    | 0.166      |
| <b>Hyperlipidemia Hx</b>               | 294<br>(40.2%)          | 168<br>(37.3%)  | 462<br>(39.1%)    | 0.324      | 412<br>(39.4%)                  | 50<br>(36.8%)    | 462<br>(39.1%)    | 0.550      |
| <b>Hypercoagulable state at 1 year</b> | 43<br>(5.9%)            | 93<br>(20.7%)   | 136<br>(11.5%)    | <0.001     | --                              | --               | --                |            |
