# Supplementary material
Source: PubMed Central journal article supplement (PMC8460678)
Supplement: NIHMS1701206-supplement-2.pdf [file NIHMS1701206-supplement-2.pdf]

**Supplemental Table 1.** International Classifications of Diseases (ICD), Ninth and Tenth Revisions (ICD-9 and ICD-10) codes used within this study

| <b>Diagnosis</b>                                 | <b>ICD-9 codes</b>                      | <b>ICD-10 codes</b> |
|--------------------------------------------------|-----------------------------------------|---------------------|
| <b>Central Retinal Vein Occlusion</b>            | 362.35                                  | H34.81x             |
| <b>Branch/Unspecified Retinal Vein Occlusion</b> | 362.36, 362.37                          | H34.83x, H34.9x     |
| <b>Primary Thrombophilia Diagnosis Codes</b>     |                                         |                     |
| Primary thrombophilia                            | 289.81                                  | D68.5               |
| Activated protein C resistance                   |                                         | D68.51              |
| Prothrombin gene mutation                        |                                         | D68.52              |
| Other thrombophilia                              |                                         | D68.6               |
| Antiphospholipid antibody syndrome               |                                         | D68.61              |
| Lupus anticoagulant syndrome                     |                                         | D68.62              |
| Homocysteinemia                                  | 270.4x                                  | E72.1x              |
| Other specified coagulation defects              |                                         | D68.8               |
| Coagulation defect, unspecified                  |                                         | D68.9               |
| Anticardiolipin antibodies                       |                                         |                     |
| Antithrombin III deficiency                      |                                         |                     |
| Factor V Leiden                                  |                                         |                     |
| Protein S                                        |                                         |                     |
| Protein C                                        |                                         |                     |
| <b>Secondary Thrombophilia Diagnosis Codes</b>   | 289.82                                  |                     |
| Venous embolus-thrombosis                        | 451.xx                                  | I82.xx              |
| Portal vein thrombosis                           | 452.xx                                  |                     |
| Other venous embolism and thrombosis             | 453.xx                                  |                     |
| Pulmonary emboli                                 | 415.1x                                  | I26.xx              |
| Chronic pulmonary embolism                       | 416.2x                                  | I27.82              |
| Polycythemia vera                                | 238.4x, 289.0x, 289.6x                  | D45.xx              |
| Essential thrombocytosis                         | 238.71                                  | D47.3x              |
| Paroxysmal nocturnal hemoglobinuria              | 283.2x                                  | D59.5x              |
| <b>Hypertension Diagnosis Codes</b>              |                                         |                     |
| Essential hypertension                           | 401.xx                                  | I10.xx              |
| Hypertensive heart disease                       | 402.xx                                  | I11.xx              |
| Hypertensive chronic kidney disease              | 403.xx                                  | I12.xx              |
| Hypertensive heart and chronic kidney disease    | 404.xx                                  | I13.xx              |
| Secondary hypertension                           | 405.xx                                  | I15.xx              |
| Hypertensive crisis                              |                                         | I16.xx              |
| <b>Diabetes Mellitus</b>                         |                                         |                     |
| Diabetes mellitus due to underlying condition    | 250.xx                                  | E08.xx              |
| Drug or chemical induced diabetes mellitus       |                                         | E09.xx              |
| Type 1 diabetes mellitus                         |                                         | E10.xx              |
| Type 2 diabetes mellitus                         |                                         | E11.xx              |
| Other specified diabetes mellitus                |                                         | E13.xx              |
| <b>Hyperlipidemia</b>                            | 272.xx                                  | E78.0x-E78.5x       |
| <b>Cancer</b>                                    | 140.xx-208.xx (excluding 173.xx), 238.6 | C00.xx-C96.xx       |
| <b>Pregnancy</b>                                 | V22.xx-V23.xx                           | Z33.xx-Z34.xx       |
