# Supplementary material
Source: PubMed Central journal article supplement (PMC8460678)
Supplement: NIHMS1701206-supplement-3.pdf [file NIHMS1701206-supplement-3.pdf]

**Supplemental Table 3: Frequency and percentage of hypercoagulability diagnoses among young CRVO patients**

|                                   | Without DM, HTN, HLD (N=71) | With DM, or HTN, or HLD (N=65) | All Hypercoagulable Cases (N=136) | All CRVO Patients (N=1181) | p value |
|-----------------------------------|-----------------------------|--------------------------------|-----------------------------------|----------------------------|---------|
| <b>Diagnosis</b>                  |                             |                                |                                   |                            | 0.899   |
| Primary Hypercoagulable state*    | 32 (45.1%)                  | 23 (35.4%)                     | 55 (40.4%)                        | 55 (4.7%)                  |         |
| Homocysteinemia                   | 4 (5.6%)                    | 4 (6.2%)                       | 8 (5.9%)                          | 8 (0.7%)                   |         |
| Secondary Hypercoagulable state** | 2 (2.8%)                    | 4 (6.2%)                       | 6 (4.4%)                          | 6 (0.5%)                   |         |
| Pulmonary emboli                  | 0 (0.0%)                    | 1 (1.5%)                       | 1 (0.7%)                          | 1 (0.1%)                   |         |
| Venous embolus-thrombosis         | 23 (32.4%)                  | 21 (32.3%)                     | 44 (32.4%)                        | 44 (3.7%)                  |         |
| Cancer                            | 6 (8.5%)                    | 8 (12.3%)                      | 14 (10.3%)                        | 14 (1.9%)                  |         |
| Essential thrombocytosis          | 1 (1.4%)                    | 1 (1.5%)                       | 2 (1.5%)                          | 2 (0.2%)                   |         |
| Other***                          | 1 (1.4%)                    | 2 (3.1%)                       | 3 (2.2%)                          | 3 (0.3%)                   |         |
| Multiple                          | 2 (2.8%)                    | 1 (1.5%)                       | 3 (2.2%)                          | 3 (0.3%)                   |         |

\*excludes homocysteinemia, which is uniquely identifiable by ICD9 and ICD10 codes

\*\*excludes pulmonary emboli, venous embolus-thrombosis, cancer, and essential thrombocytosis which are all uniquely identifiable by their own ICD9 and ICD10 codes.

\*\*\*Includes diseases that shared ICD10 codes D68.8x and D68.9x which maps to the following list of diagnoses: Antiphospholipid antibody syndrome, Anticardiolipin antibodies, Lupus Anticoagulant, Antithrombin III Deficiency, Factor V Leiden, Protein S, and Protein C deficiency
